# Supplementary material for: Mesoporous Silica Nanoparticles Enhance the Anticancer Efficacy of Platinum(IV)-Phenolate Conjugates in Breast Cancer Cell Lines
Source: MDPI journal article supplement (doi:10.3390/nano12213767), 2022-10-26
Supplement: s1 [file s1]

# Mesoporous Silica Nanoparticles Enhance the Anticancer Efficacy of Platinum(IV)-Phenolate Conjugates in Breast Cancer Cell Lines

Ivana Predarska <sup>1,2</sup>, Mohamad Saoud <sup>3</sup>, Dijana Drača <sup>4</sup>, Ibrahim Morgan <sup>3</sup>, Teodora Komazec <sup>4</sup>, Thomas Eichhorn <sup>2</sup>, Ekatarina Mihajlović <sup>4</sup>, Duško Dunderović <sup>5</sup>, Sanja Mijatović <sup>4</sup>, Danijela Maksimović-Ivanić <sup>4</sup>, Evamarie Hey-Hawkins <sup>1,\*</sup> and Goran N. Kaluderović <sup>2,3,\*</sup>

<sup>1</sup> Faculty of Chemistry and Mineralogy, Institute of Inorganic Chemistry, Universität Leipzig, Johannisallee 29, 04103 Leipzig, Germany

<sup>2</sup> Department of Engineering and Natural Sciences, University of Applied Sciences Merseburg, Eberhard-Leibnitz-Str. 2, 06217 Merseburg, Germany

<sup>3</sup> Department of Bioorganic Chemistry, Leibniz Institute of Plant Biochemistry, Weinberg 3, 06120 Halle (Saale), Germany

<sup>4</sup> Institute for Biological Research "Siniša Stanković", National Institute of Republic of Serbia, University of Belgrade; Bulevar despota Stefana 142, 11060 Belgrade, Serbia

<sup>5</sup> Institute of Pathology, School of Medicine, University of Belgrade, dr Subotića 1, 11000 Belgrade, Serbia

\* Correspondence: hey@uni-leipzig.de (E.H.-H.); goran.kaluderovic@hs-merseburg.de (G.N.K.); Tel.: +49-341-97-36151 (E.H.-H.); +49-3461-46-2012 (G.N.K.).

## Electronic Supplementary Information

### Table of Contents

|                                                                               |    |
|-------------------------------------------------------------------------------|----|
| <b>Characterization of platinum(IV) conjugates 1–3</b> .....                  | 3  |
| NMR spectra of conjugate <b>1</b> .....                                       | 3  |
| Mass spectra of conjugate <b>1</b> .....                                      | 5  |
| NMR spectra of conjugate <b>2</b> .....                                       | 6  |
| Mass spectra of conjugate <b>2</b> .....                                      | 8  |
| NMR spectra of conjugate <b>3</b> .....                                       | 10 |
| Mass spectra of conjugate <b>3</b> .....                                      | 11 |
| <b>Attempted <i>O</i>-deacetylation of 1 with enzyme Amano lipase A</b> ..... | 13 |
| <b>Stability of conjugates 1–3 in DMSO</b> .....                              | 14 |
| <b>Encapsulation efficiency calculation</b> .....                             | 16 |
| <b>Drug release kinetics</b> .....                                            | 18 |
| <b>Cell viability</b> .....                                                   | 21 |
| <b>Urine parameters upon <i>in vivo</i> treatment</b> .....                   | 25 |

## Characterization of platinum(IV) conjugates 1–3

### NMR spectra of conjugate **1**

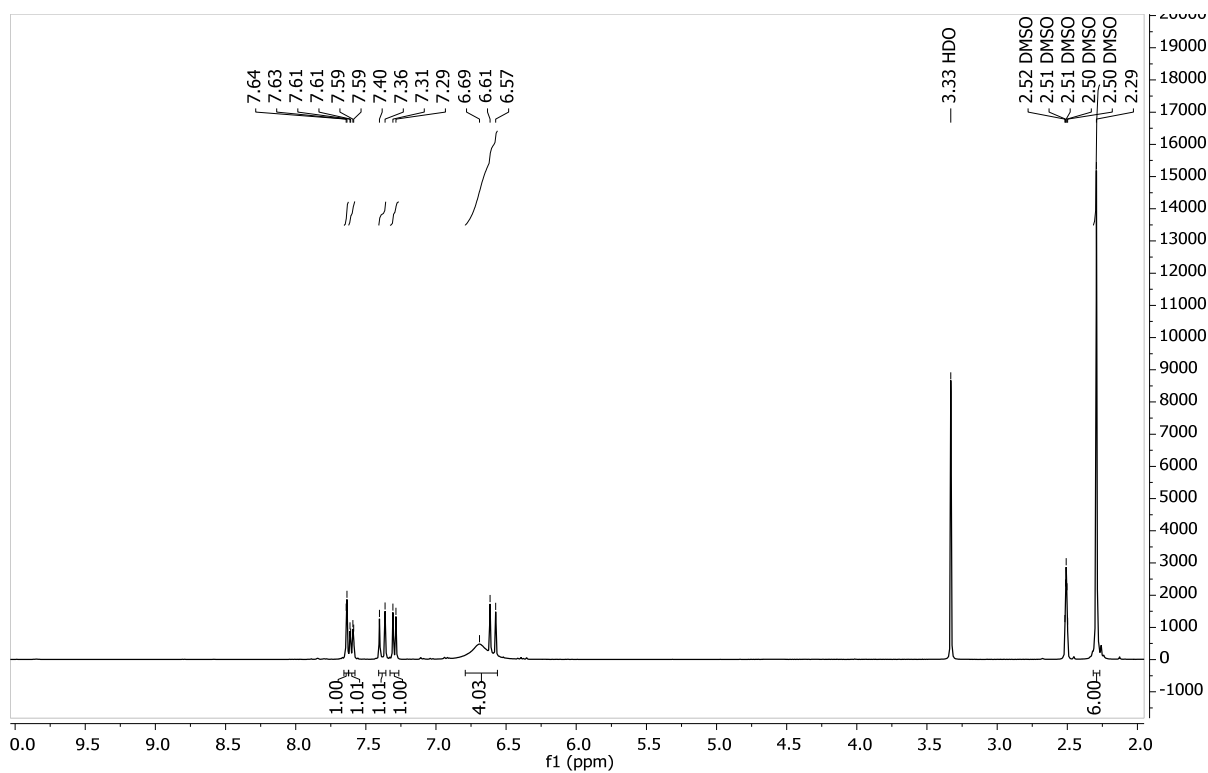

**Figure S1.**  $^1\text{H}$  NMR spectrum of **1** in  $\text{DMSO}-d_6$ .

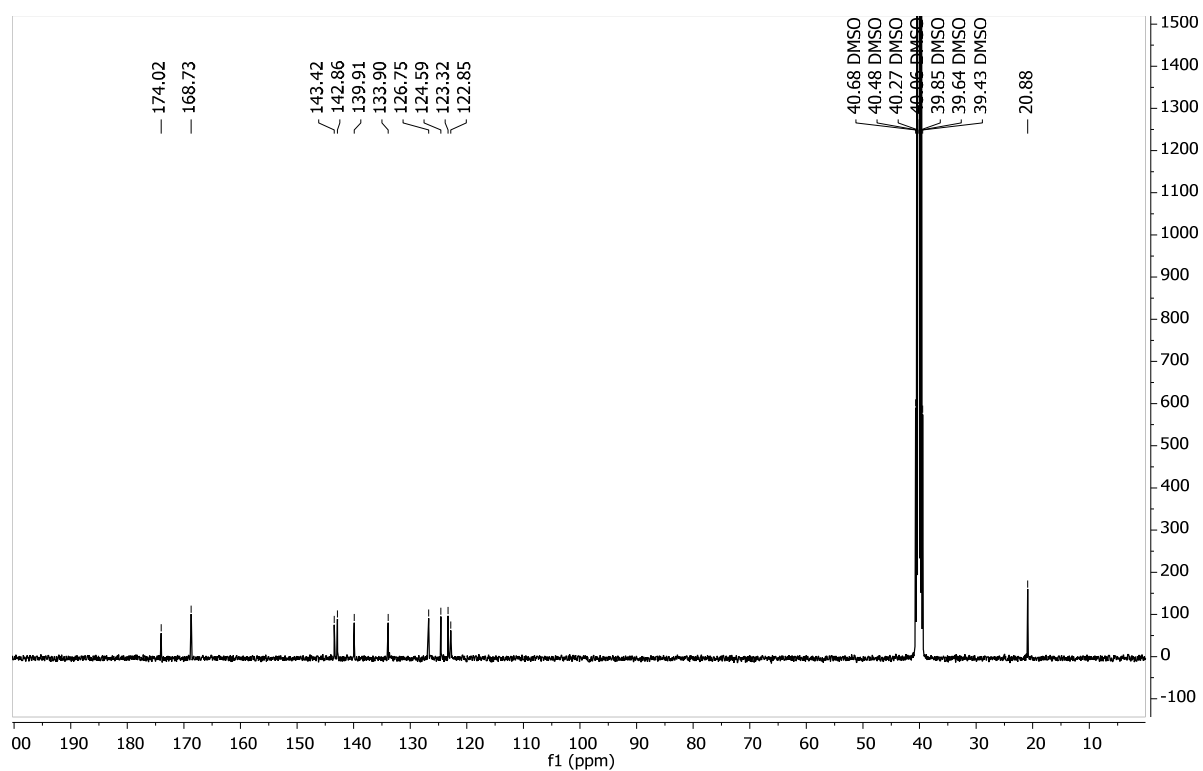

**Figure S2.**  $^{13}\text{C}\{^1\text{H}\}$  NMR spectrum of **1** in  $\text{DMSO}-d_6$ .

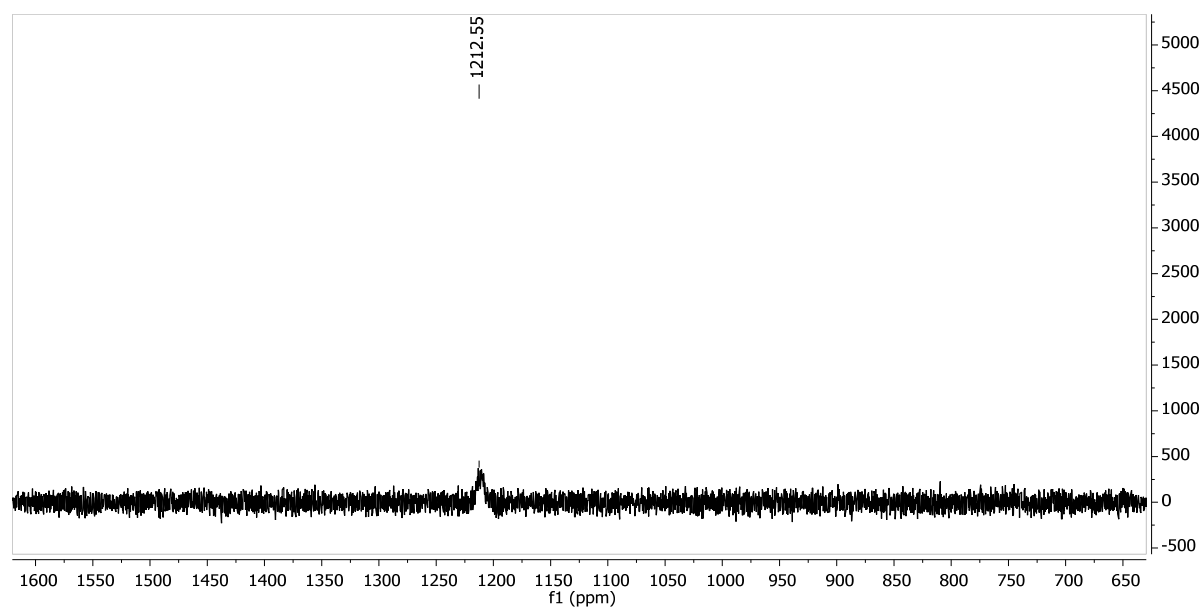

**Figure S3.**  $^{195}\text{Pt}\{^1\text{H}\}$  NMR spectrum of **1** in  $\text{DMSO}-d_6$ .

## Mass spectra of conjugate **1**

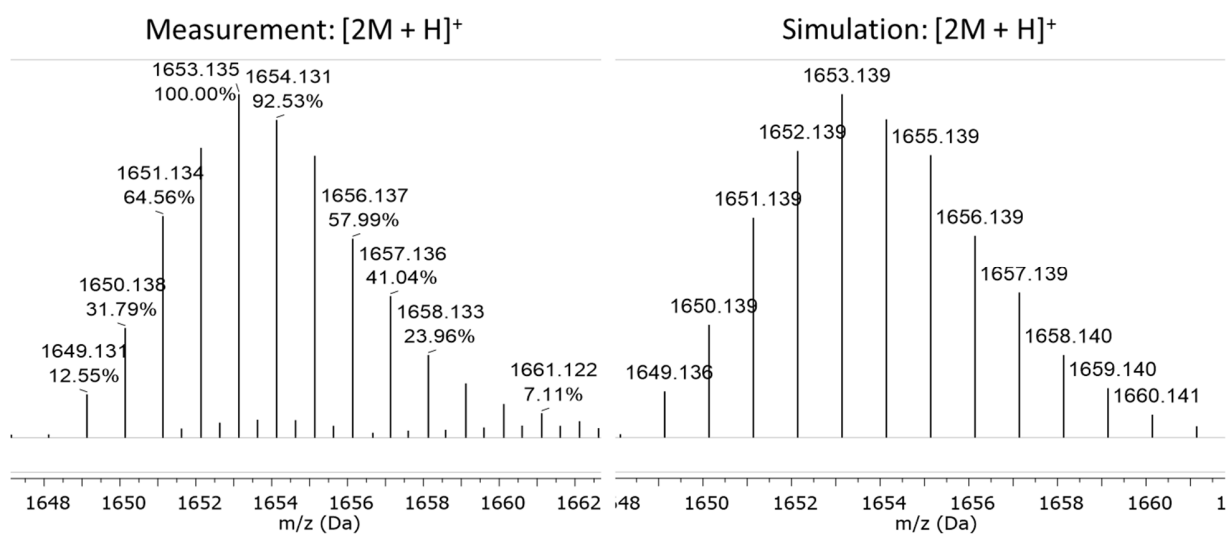

**Figure S4.** HR-ESI-MS (positive mode, CH<sub>3</sub>OH) of **1**,  $m/z$   $[2M+H]^+$ .

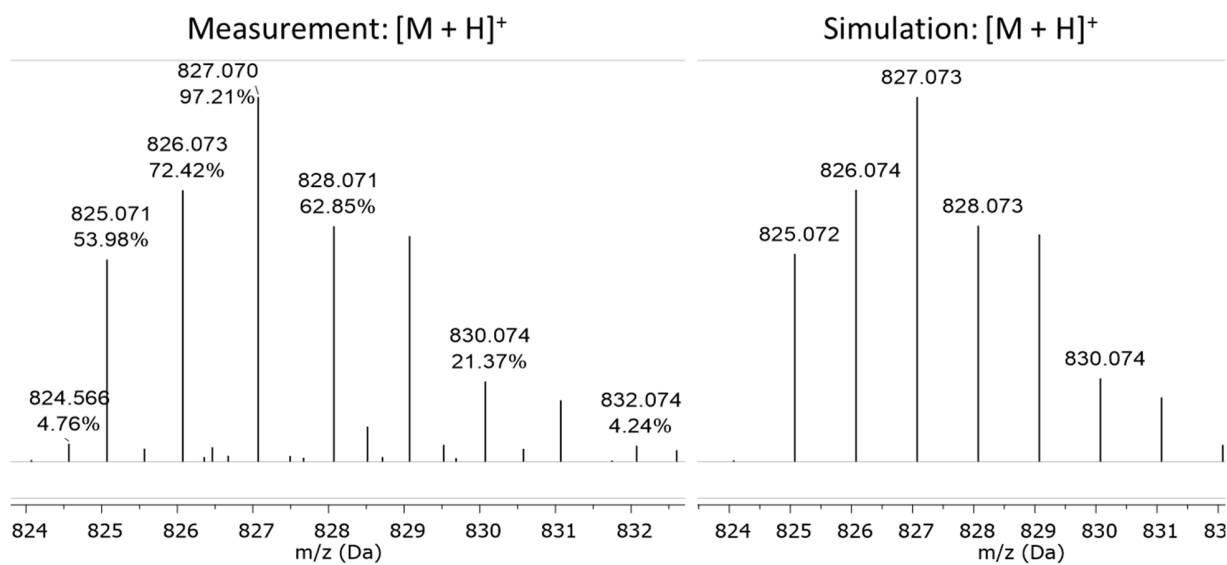

**Figure S5.** HR-ESI-MS (positive mode, CH<sub>3</sub>OH) of **1**,  $m/z$   $[M+H]^+$ .

## NMR spectra of conjugate 2

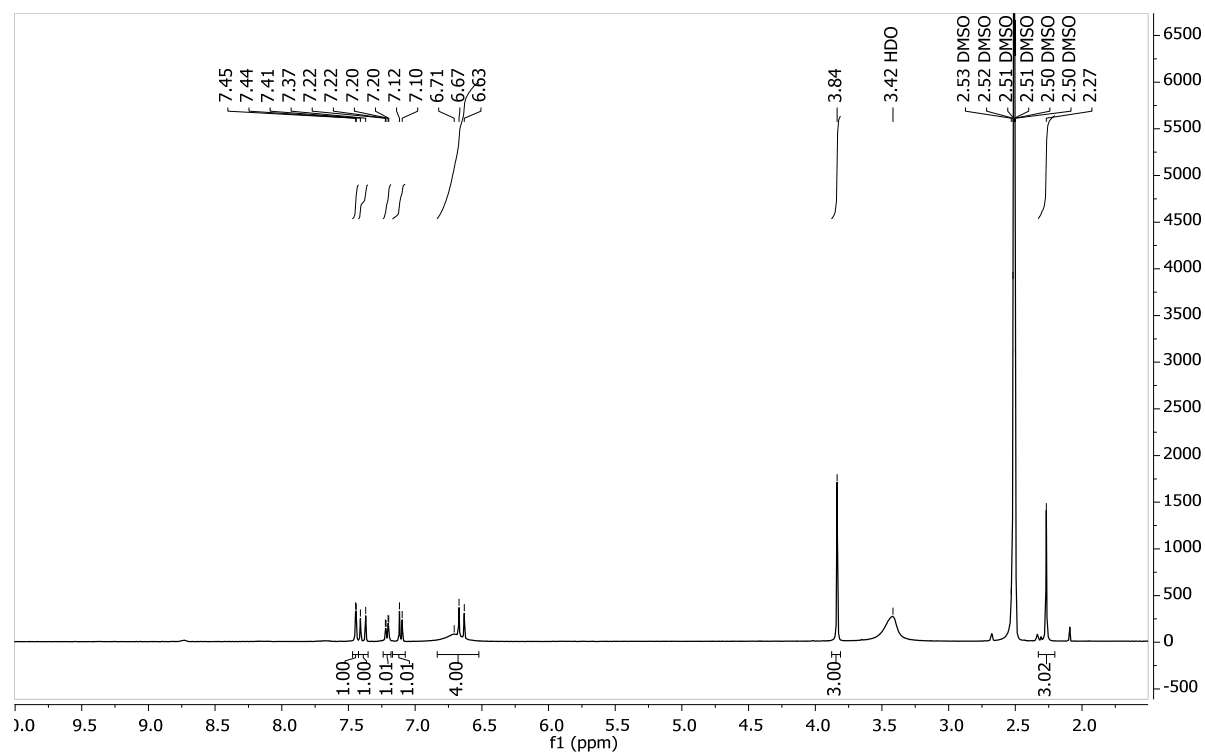

**Figure S6.** <sup>1</sup>H NMR spectrum of **2** in DMSO-*d*<sub>6</sub>.

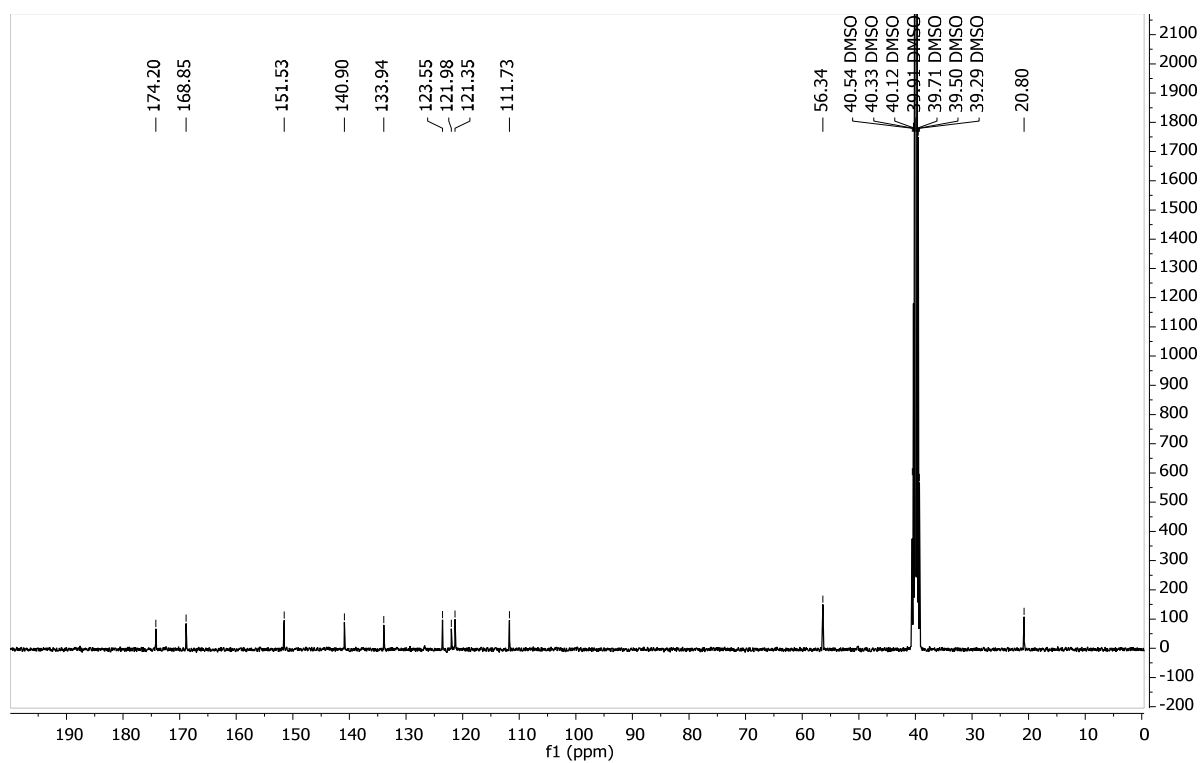

**Figure S7.**  $^{13}\text{C}\{^1\text{H}\}$  NMR spectrum of **2** in  $\text{DMSO}-d_6$ .

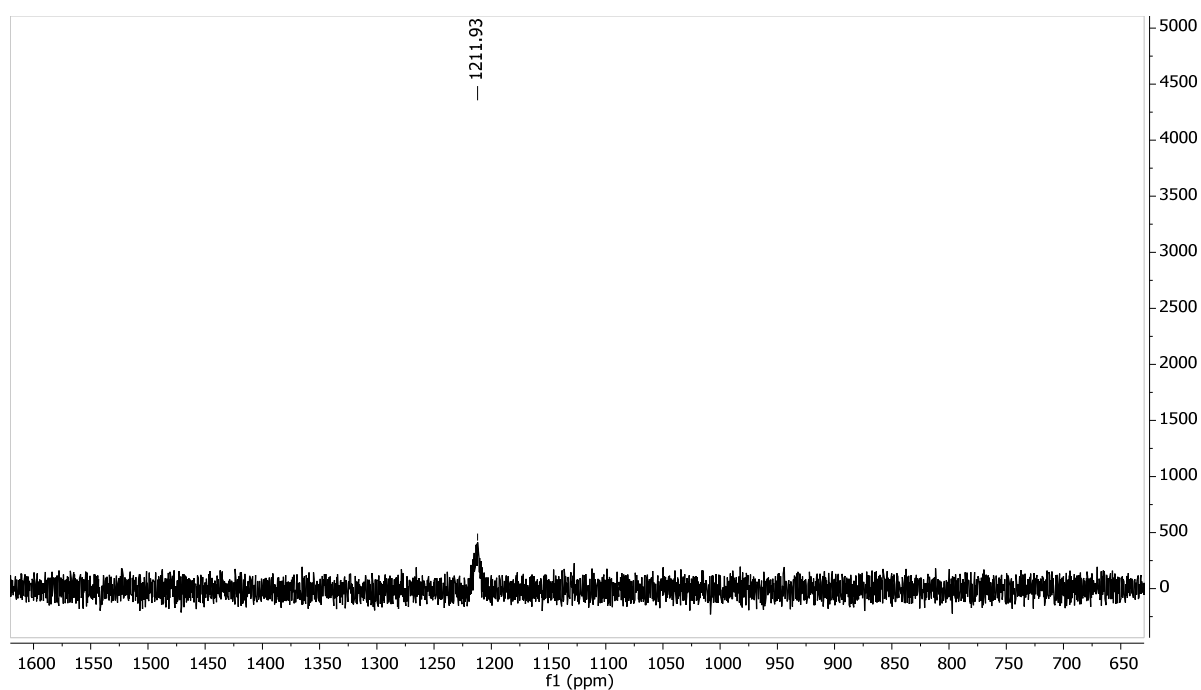

**Figure S8.**  $^{195}\text{Pt}\{^1\text{H}\}$  NMR spectrum of **2** in  $\text{DMSO}-d_6$ .

## Mass spectra of conjugate 2

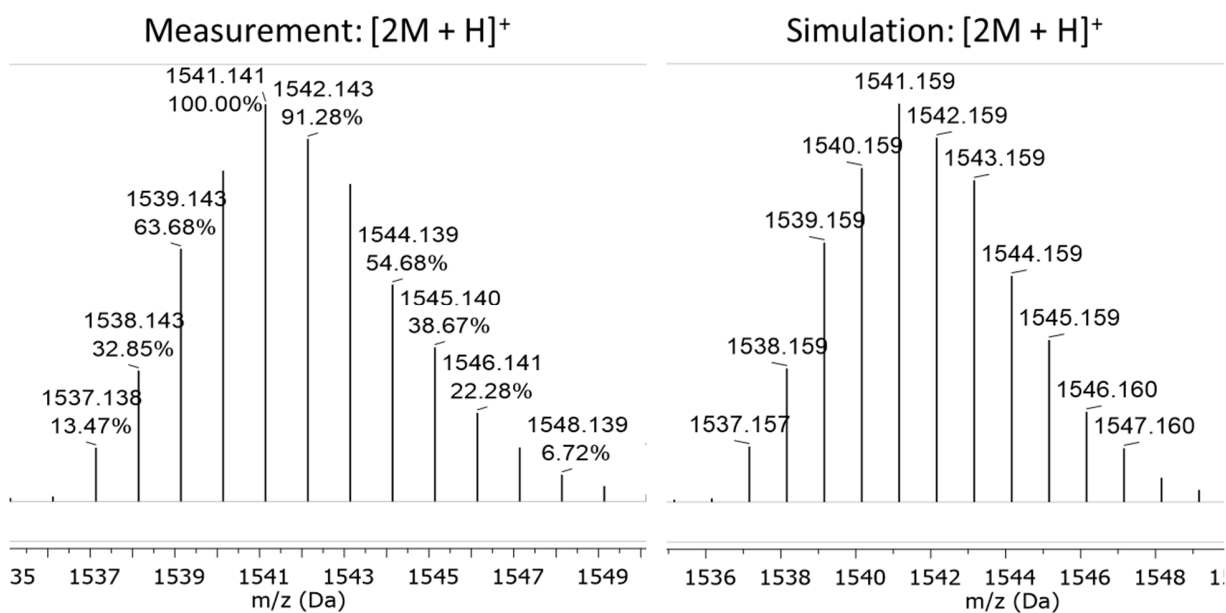

**Figure S9.** HR-ESI-MS (positive mode, CH<sub>3</sub>OH) of **2**,  $m/z$   $[2M+H]^+$ .

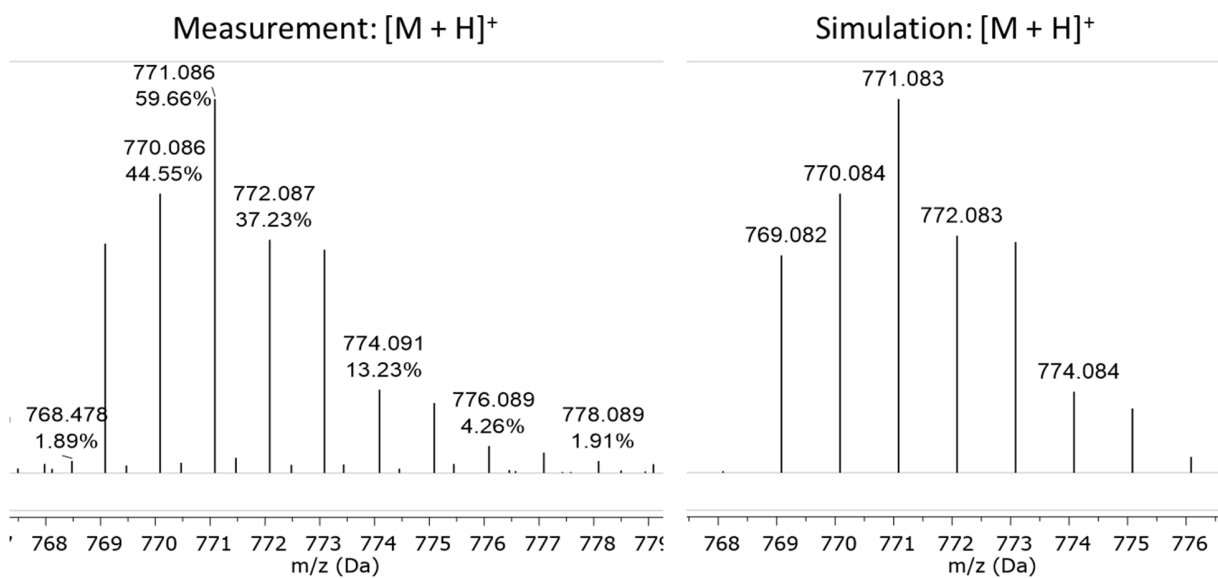

**Figure S10.** HR-ESI-MS (positive mode, CH<sub>3</sub>OH) of **2**,  $m/z$   $[M+H]^+$ .



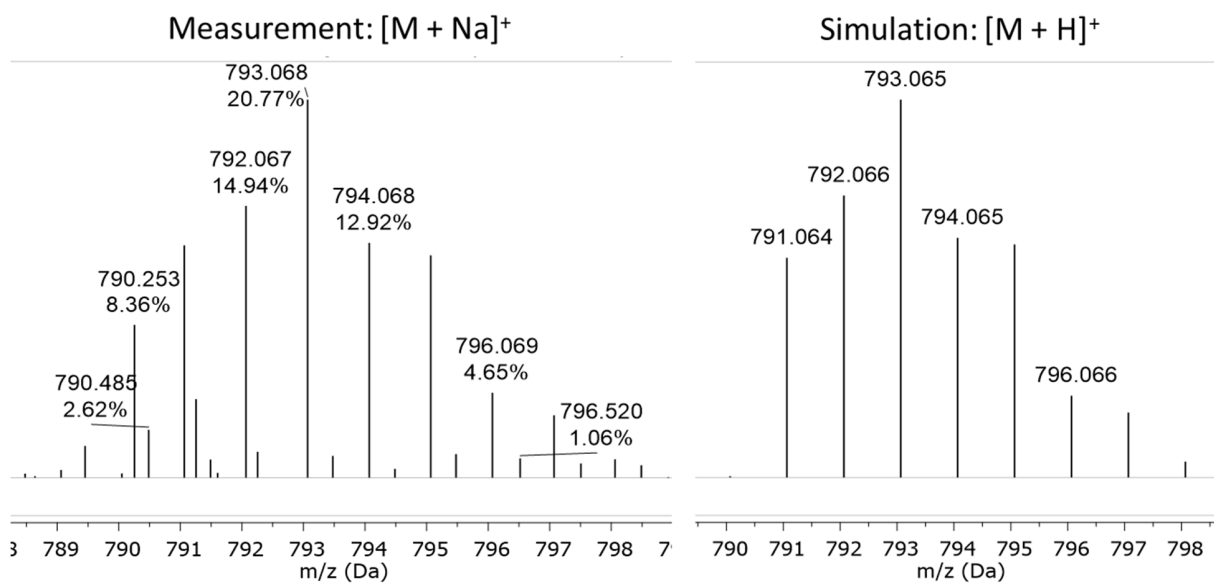

**Figure S11.** HR-ESI-MS (positive mode,  $\text{CH}_3\text{OH}$ ) of **2**,  $m/z$   $[M + Na]^+$ .

# NMR spectra of conjugate **3**

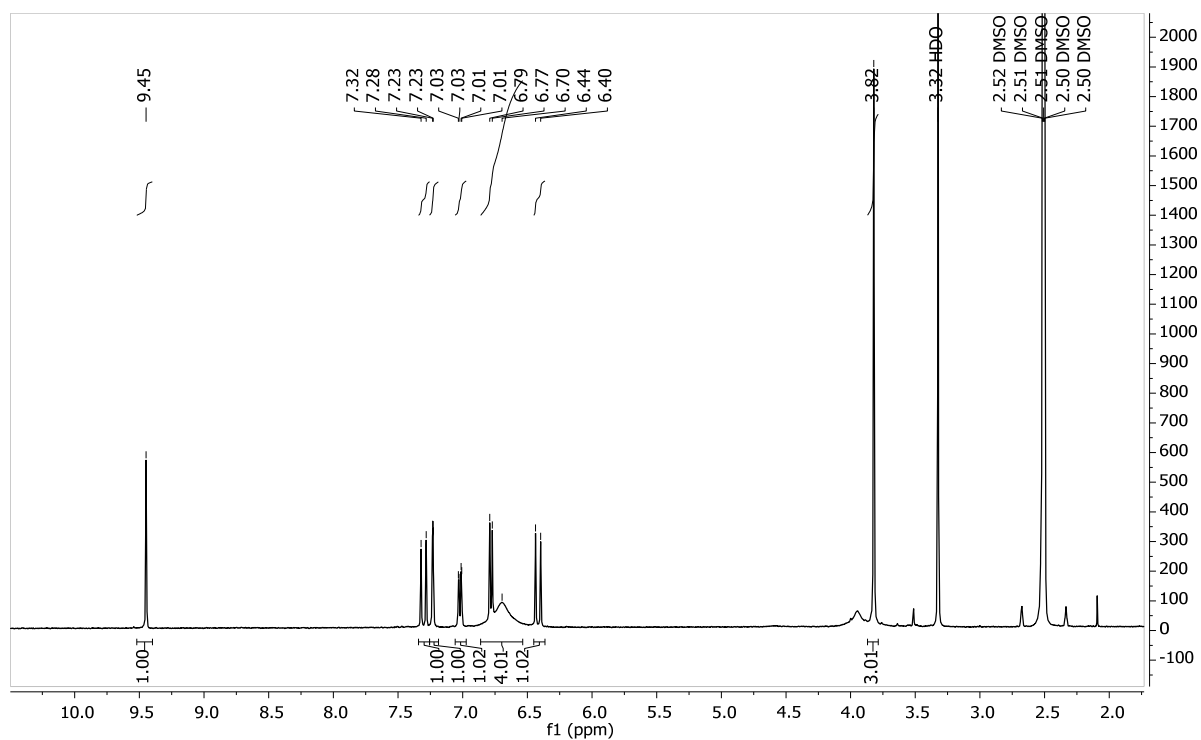

**Figure S12.** <sup>1</sup>H NMR spectrum of **3** in DMSO-*d*<sub>6</sub>.

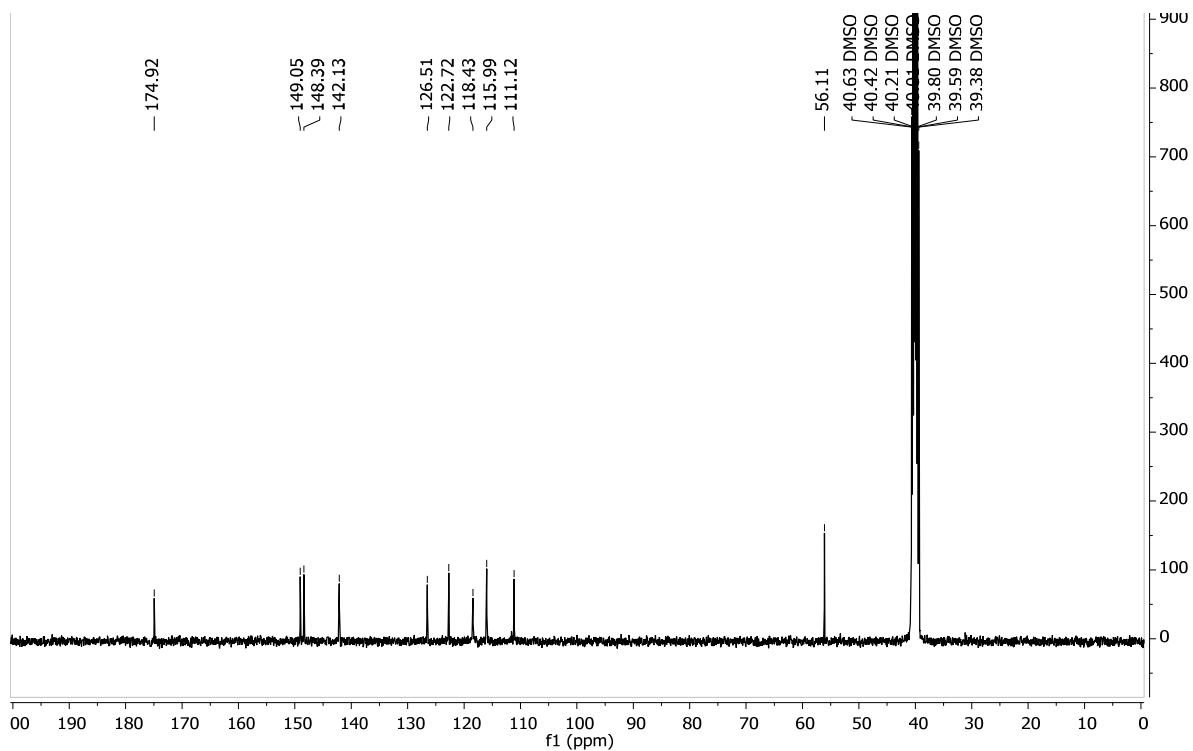

**Figure S13.** <sup>13</sup>C{<sup>1</sup>H} NMR spectrum of **3** in DMSO-*d*<sub>6</sub>.

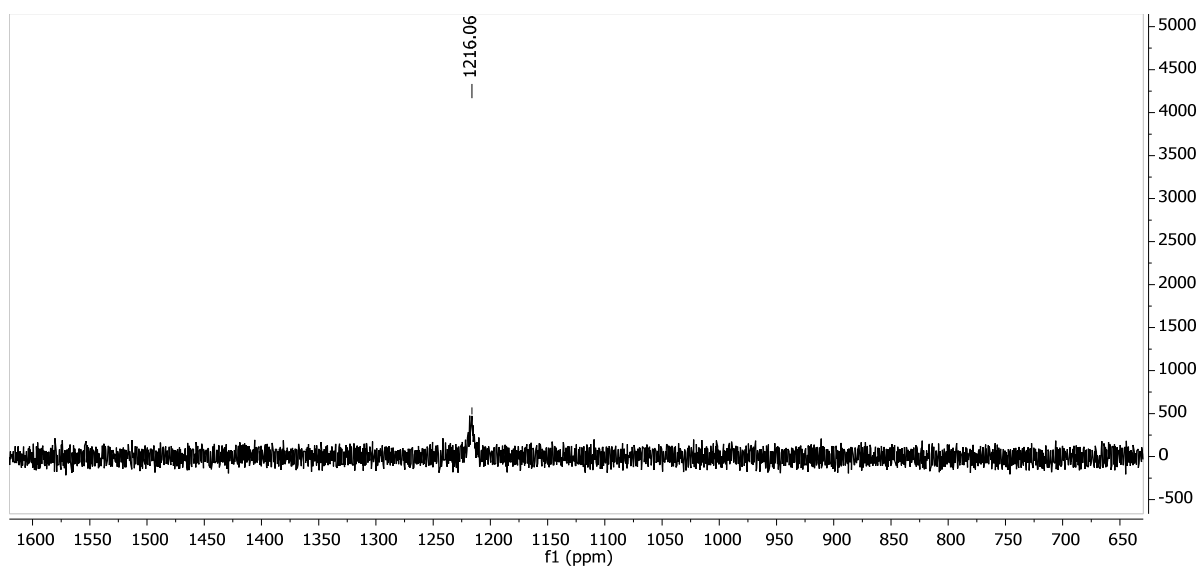

**Figure S14.**  $^{195}\text{Pt}\{^1\text{H}\}$  NMR spectrum of **3** in  $\text{DMSO-}d_6$ .

Mass spectra of conjugate **3**

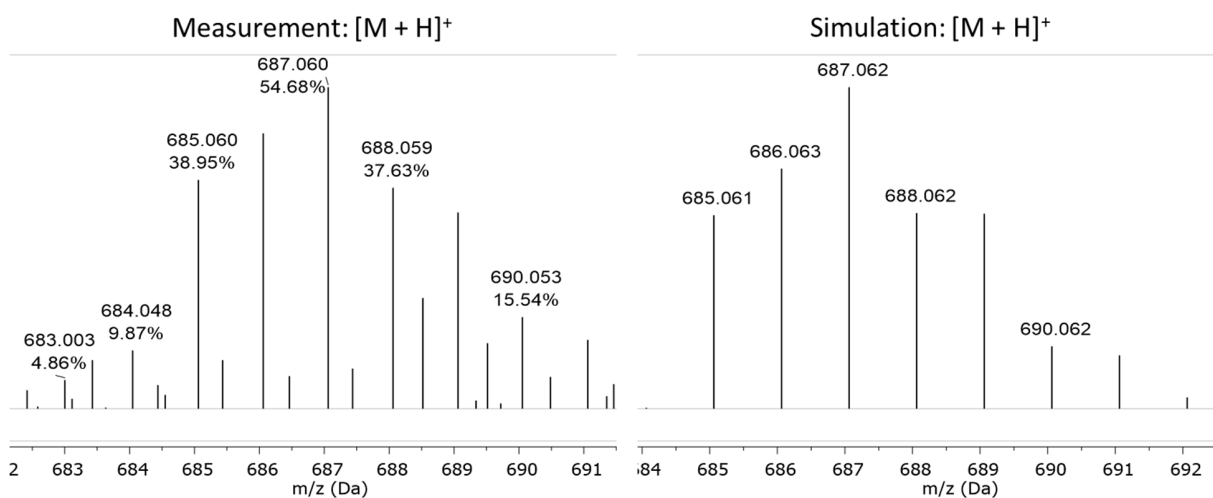

**Figure S15.** HR-ESI-MS (positive mode,  $\text{CH}_3\text{OH}$ ) of **3**,  $m/z$   $[\text{M} + \text{H}]^+$ .

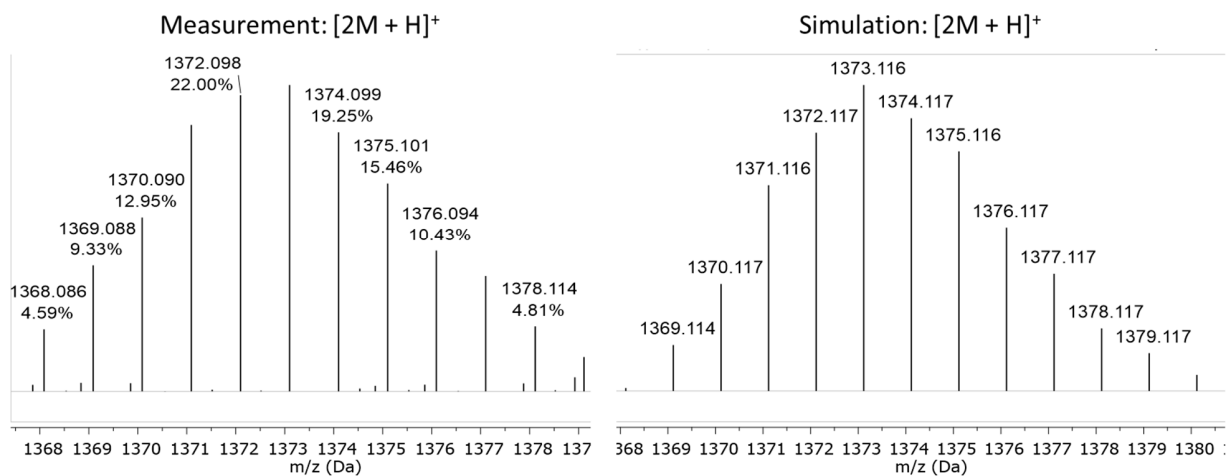

**Figure S16.** HR-ESI-MS (positive mode,  $\text{CH}_3\text{OH}$ ) of **3**,  $m/z$   $[2M+H]^+$ .

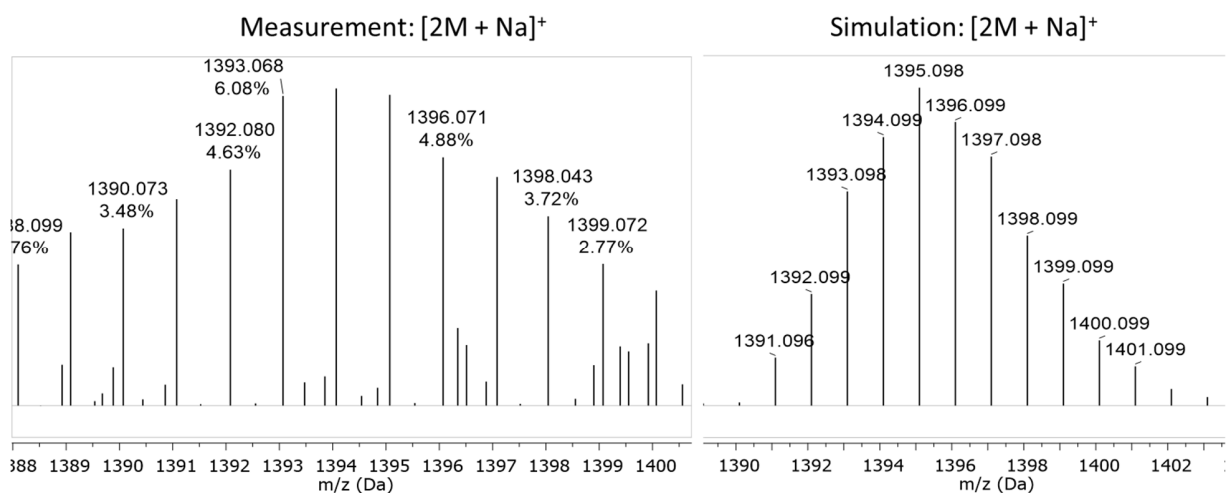

**Figure S17.** HR-ESI-MS (positive mode,  $\text{CH}_3\text{OH}$ ) of **3**,  $m/z$   $[2M+Na]^+$ .

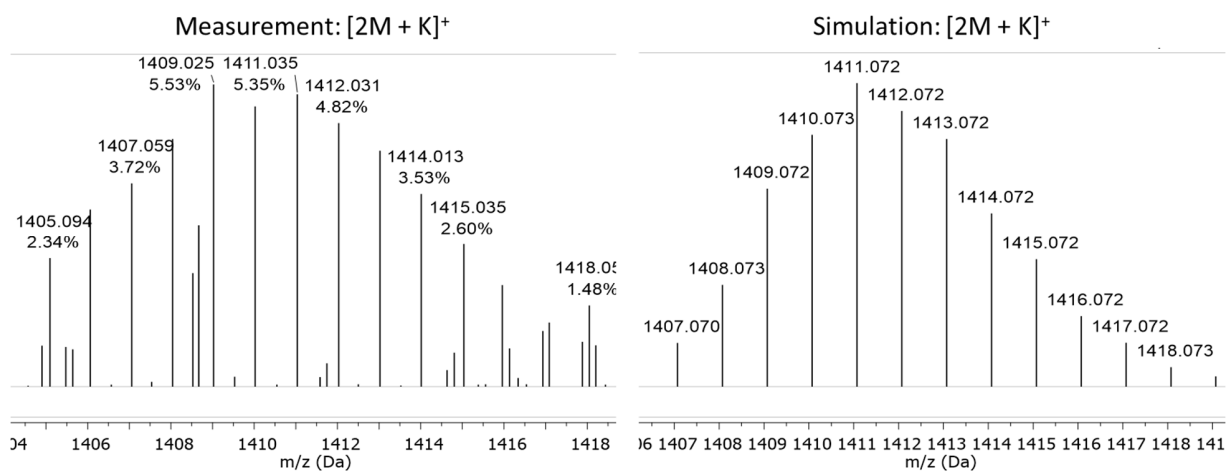

**Figure S18.** HR-ESI-MS (positive mode, CH<sub>3</sub>OH) of **3**,  $m/z$  [2M+K]<sup>+</sup>.

### Attempted *O*-deacetylation of **1** with enzyme Amano lipase A

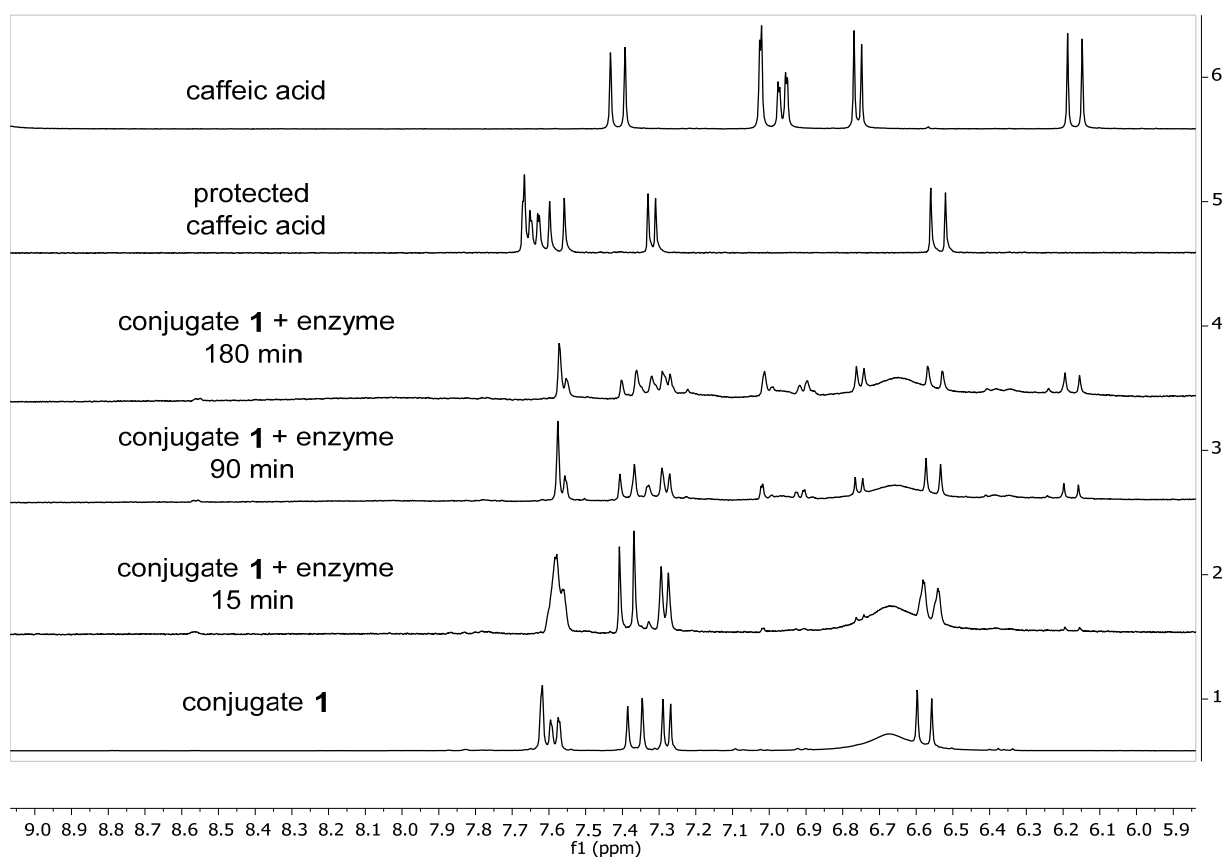

**Figure S19.** Attempted *O*-deacetylation of **1** with enzyme Amano lipase A from *Aspergillus niger*; time-resolved <sup>1</sup>H NMR spectra in DMSO-*d*<sub>6</sub>, aromatic region section.

## Stability of conjugates 1–3 in DMSO

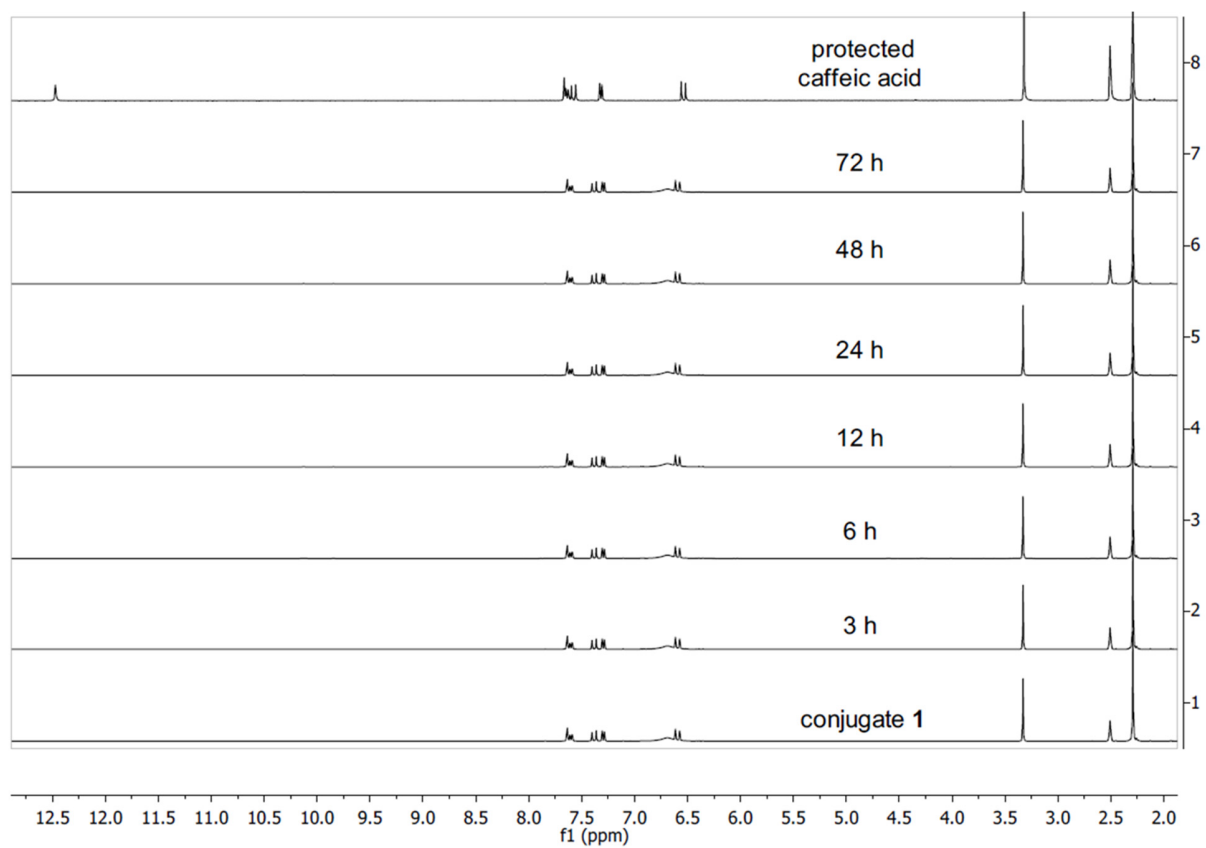

**Figure S20.** Stability of **1** in  $\text{DMSO}-d_6$  over 72 h; time-resolved  $^1\text{H}$  NMR spectra.

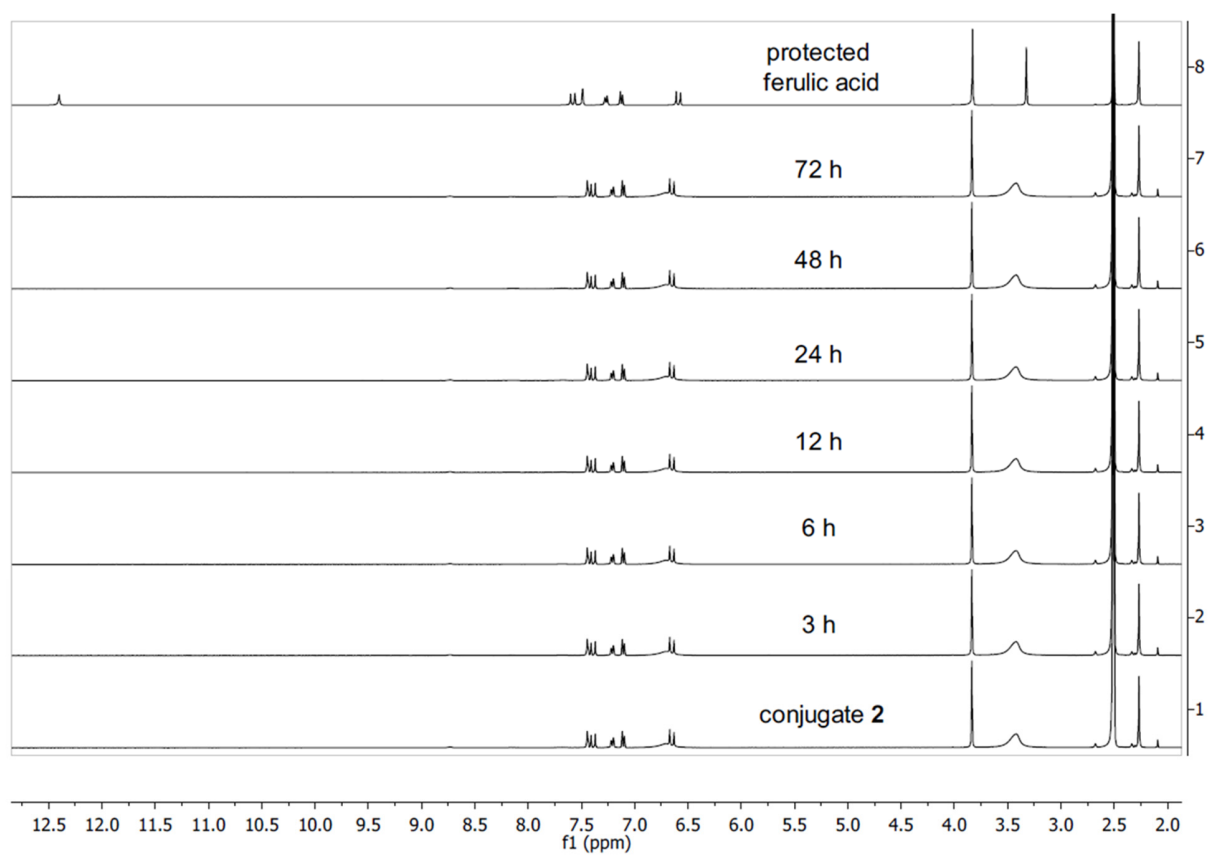

**Figure S21.** Stability of **2** in DMSO-*d*<sub>6</sub> over 72 h; time-resolved <sup>1</sup>H NMR spectra.

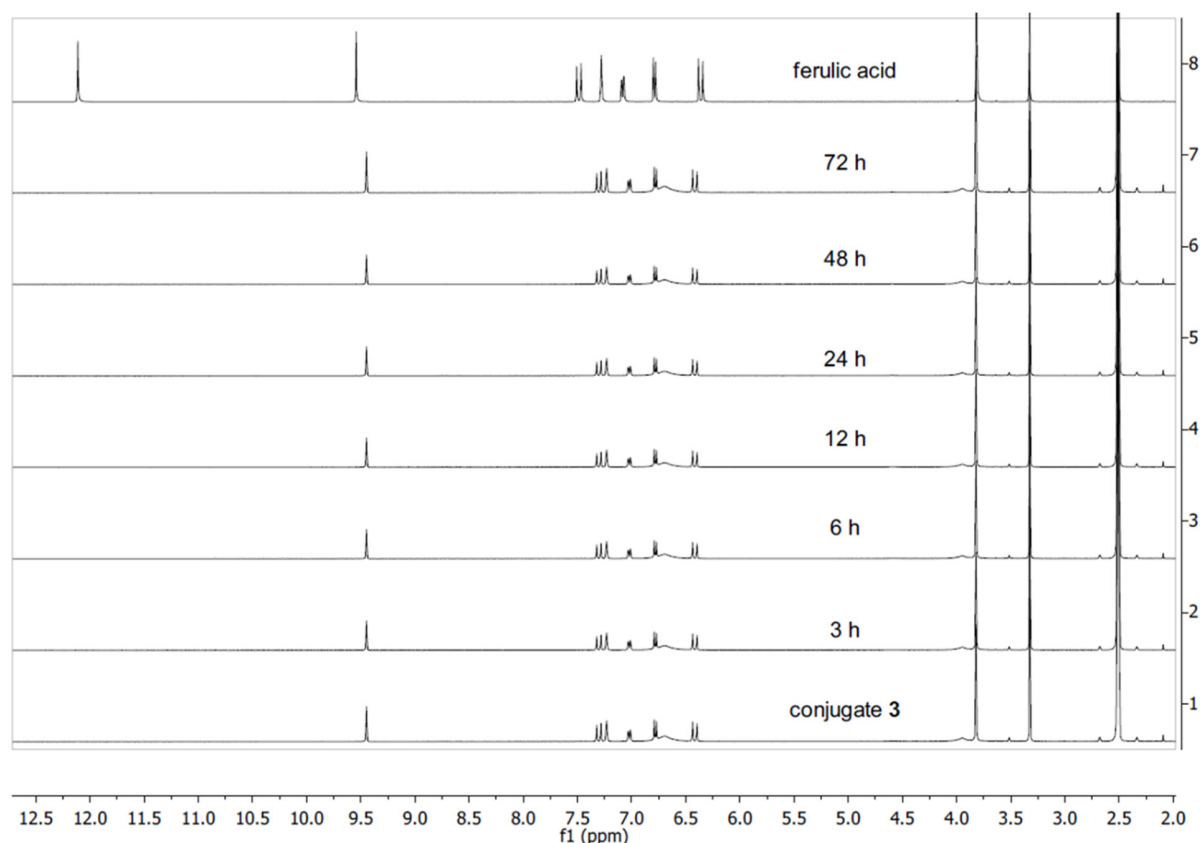

**Figure S22.** Stability of **3** in DMSO- $d_6$  over 72 h; time-resolved  $^1\text{H}$  NMR spectra.

## Encapsulation efficiency calculation

The encapsulation efficiency of the platinum(IV) conjugates **1–3** in the corresponding mesoporous silica nanoparticles (MSNs), SBA-15|**1**, SBA-15|**2** and SBA-15|**3**, was calculated based on the amount of platinum in the drug-loaded MSNs determined by energy dispersive X-ray (EDX) analysis. First, homogeneous distribution of the drugs (**1**, **2** and **3**) in the corresponding materials was established by determination of the spatial distribution of silicon and platinum accomplished through EDX mapping (Figure S23). Second, the relative weight % of silicon and platinum was measured at six randomly chosen points (Table S1). Based on these results, Pt/Si ratios were calculated for all materials (0.29, 0.35 and 0.37 for SBA-15|**1**, SBA-15|**2** and SBA-15|**3**, respectively, Table S2) and compared to the theoretical ones to afford the load content of platinum (7.51 wt%, 9.23 wt% and 10.33 wt% for SBA-15|**1**, SBA-15|**2** and SBA-15|**3**, respectively, Table S2) and the corresponding encapsulation efficiency (70.36 %, 83.83 % and 89.24 % for SBA-15|**1**, SBA-15|**2** and SBA-15|**3**, respectively, Table S2).



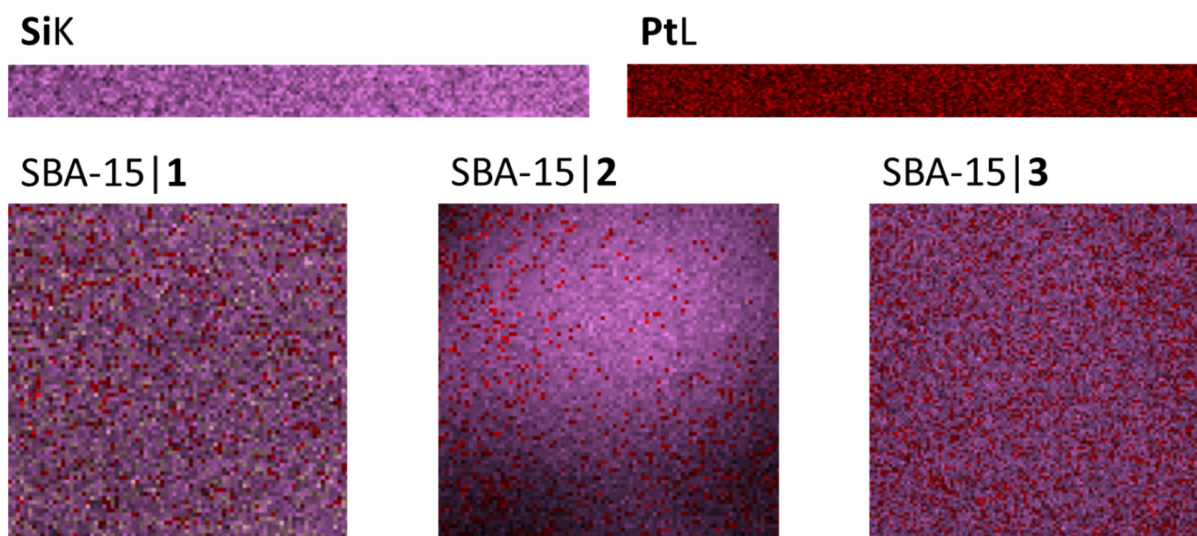

**Figure S23.** Spatial distribution of silicon and platinum in SBA 15|1, SBA 15|2 and SBA 15|3 determined through EDX mapping.

**Table S1.** Relative weight % of silicon and platinum at six points in SBA-15|1, SBA-15|2 and SBA-15|3 determined by EDX analysis.

|                 | SBA-15 1    |             | SBA-15 2    |             | SBA-15 3    |             |
|-----------------|-------------|-------------|-------------|-------------|-------------|-------------|
|                 | Si          | Pt          | Si          | Pt          | Si          | Pt          |
|                 | wt%         |             |             |             |             |             |
|                 | 78.2        | 21.8        | 70.4        | 29.6        | 73.5        | 26.5        |
|                 | 76.3        | 23.7        | 73.2        | 26.8        | 74.1        | 25.9        |
|                 | 76.4        | 23.6        | 76.8        | 23.2        | 72.2        | 27.8        |
|                 | 77.6        | 22.4        | 72.1        | 27.9        | 72.4        | 27.6        |
|                 | 77.9        | 22.1        | 77.8        | 22.3        | 72.7        | 27.3        |
|                 | 77.7        | 22.4        | 74.4        | 25.6        | 72.3        | 27.7        |
| <b>Average:</b> | <b>77.3</b> | <b>22.7</b> | <b>74.1</b> | <b>25.9</b> | <b>72.9</b> | <b>27.1</b> |

**Table S2.** Platinum load (wt%) and encapsulation efficiency (%) in SBA-15|1, SBA-15|2 and SBA-15|3.

|                              | SBA-15 1 | SBA-15 2 | SBA-15 3 |
|------------------------------|----------|----------|----------|
| Theoretical Pt/Si ratio      | 0.42     | 0.42     | 0.42     |
| Calculated Pt/Si ratio       | 0.29     | 0.35     | 0.37     |
| Theoretical Pt load (wt%)    | 10.67    | 11.01    | 11.57    |
| Calculated Pt load (wt%)     | 7.51     | 9.23     | 10.33    |
| Encapsulation efficiency (%) | 70.36    | 83.83    | 89.24    |

## Drug release kinetics

To study the kinetics of the drug release, *in vitro* drug release data was quantitatively correlated with four mathematical models viz. zero-order, first-order, Higuchi and Korsmeyer–Peppas models. The obtained constants and degrees of correlation  $R^2$  for each model are given in Table S3.

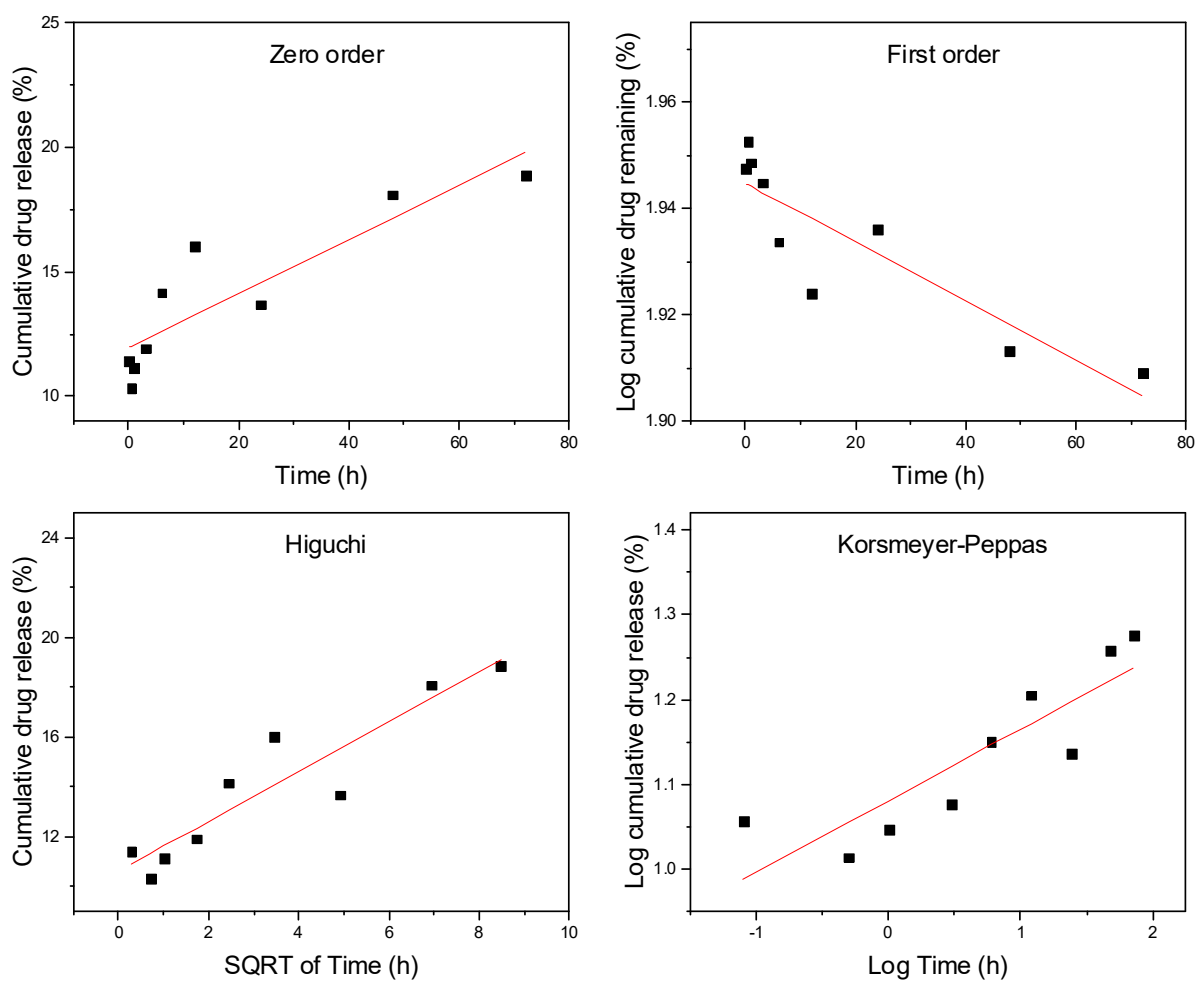

**Figure S24.** Zero order, first order, Higuchi and Korsmeyer–Peppas kinetic release of **1** from SBA-15|**1**.

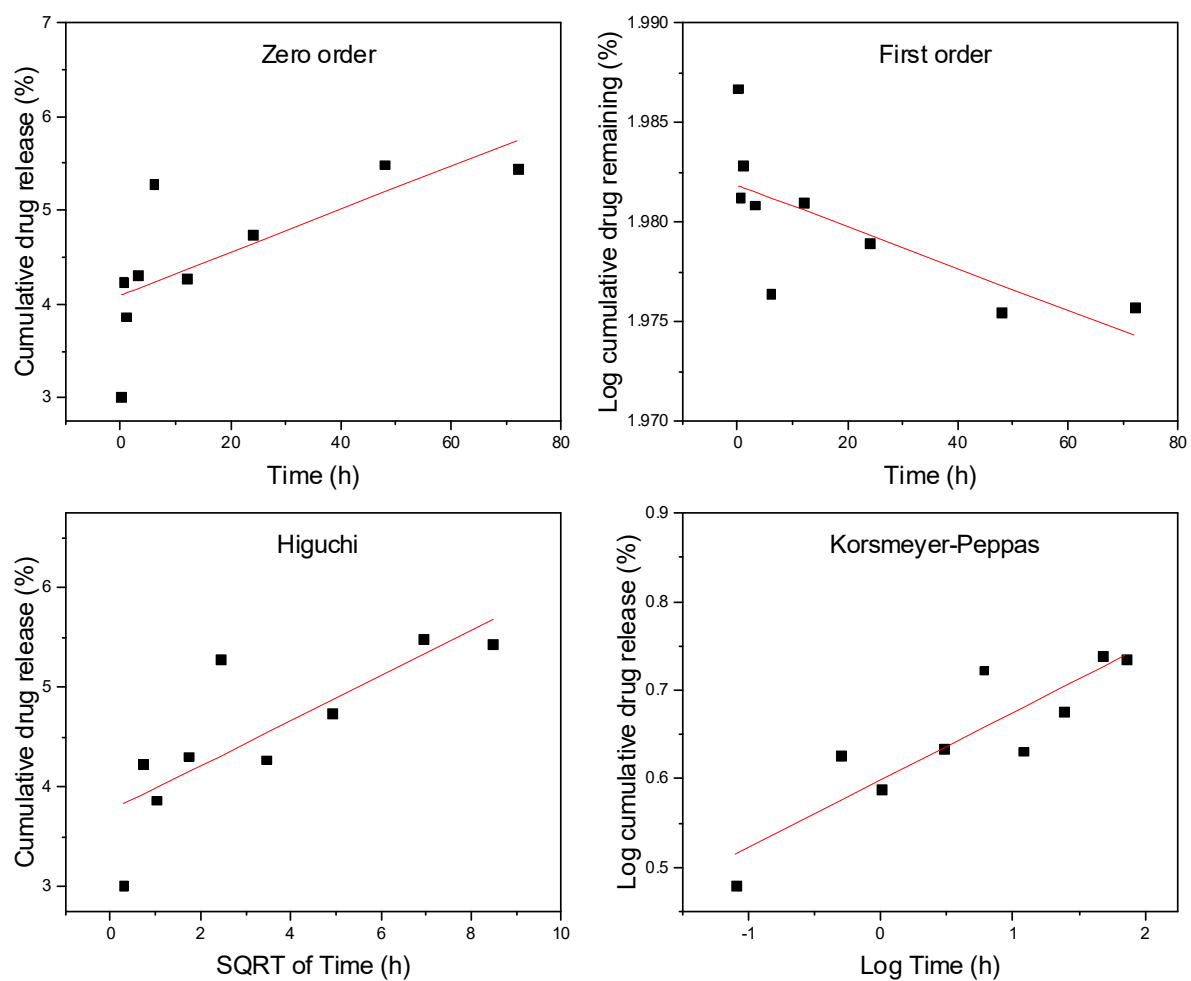

**Figure S25.** Zero order, first order, Higuchi and Korsmeyer–Peppas kinetic release of **2** from SBA-15|**2**.

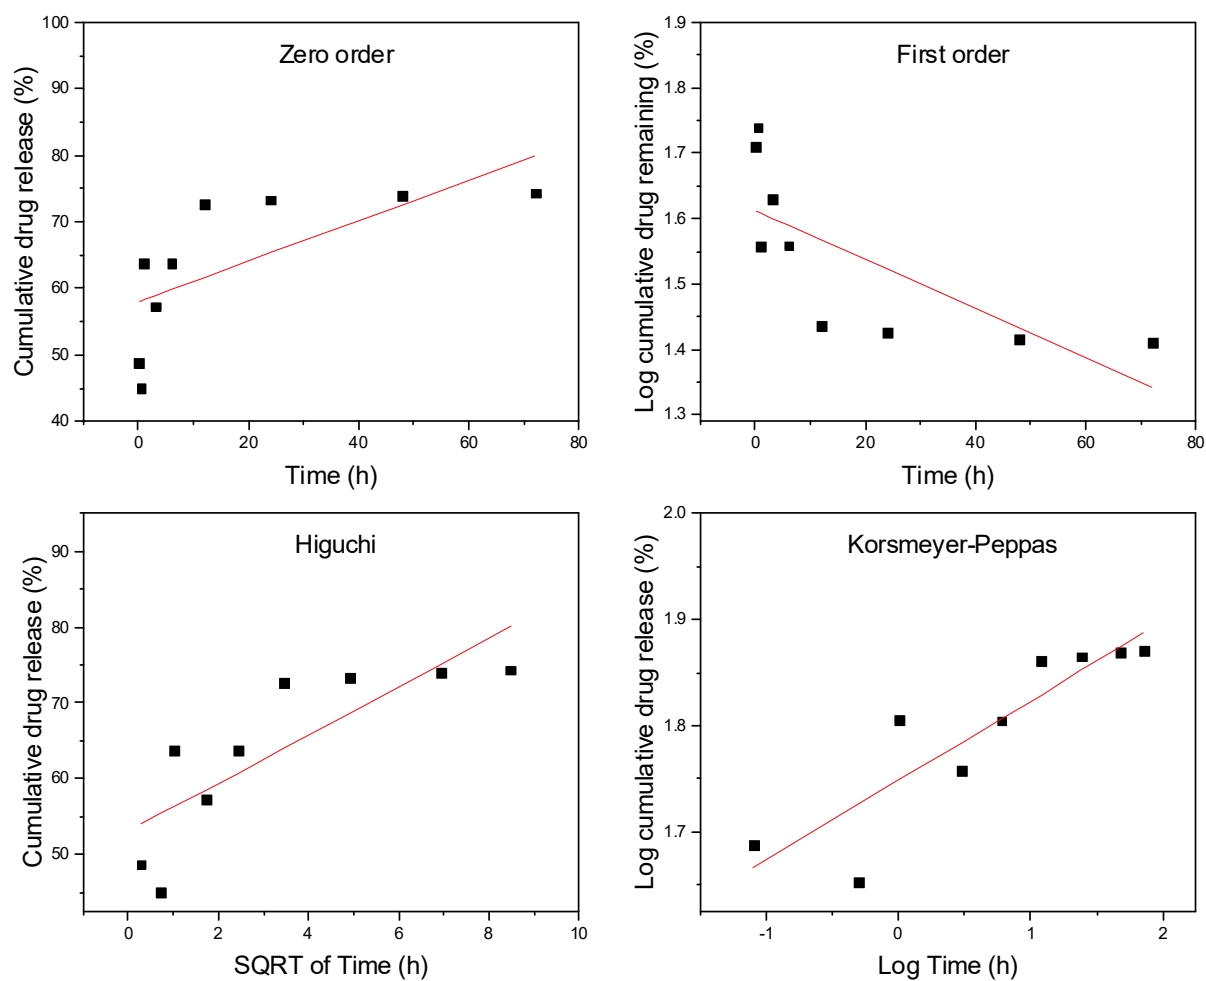

**Figure S26.** Zero order, first order, Higuchi and Korsmeyer–Peppas kinetic release of **3** from SBA-15|**3**.

**Table S3.** Constants and coefficient of determinations ( $R^2$ ) for each model.

|                  | Zero order |       | First Order |       | Higuchi |       | Korsmeyer–Peppas |       |
|------------------|------------|-------|-------------|-------|---------|-------|------------------|-------|
|                  | $K^0$      | $R^2$ | $Q_{inf}$   | $R^2$ | $K_h$   | $R^2$ | $n$              | $R^2$ |
| SBA-15  <b>1</b> | 0.109      | 0.785 | 0.001       | 0.793 | 1.003   | 0.867 | 0.085            | 0.763 |
| SBA-15  <b>2</b> | 0.023      | 0.514 | 0.001       | 0.516 | 0.225   | 0.641 | 0.075            | 0.790 |
| SBA-15  <b>3</b> | 0.304      | 0.477 | 0.009       | 0.539 | 3.173   | 0.672 | 0.074            | 0.793 |

## Cell viability

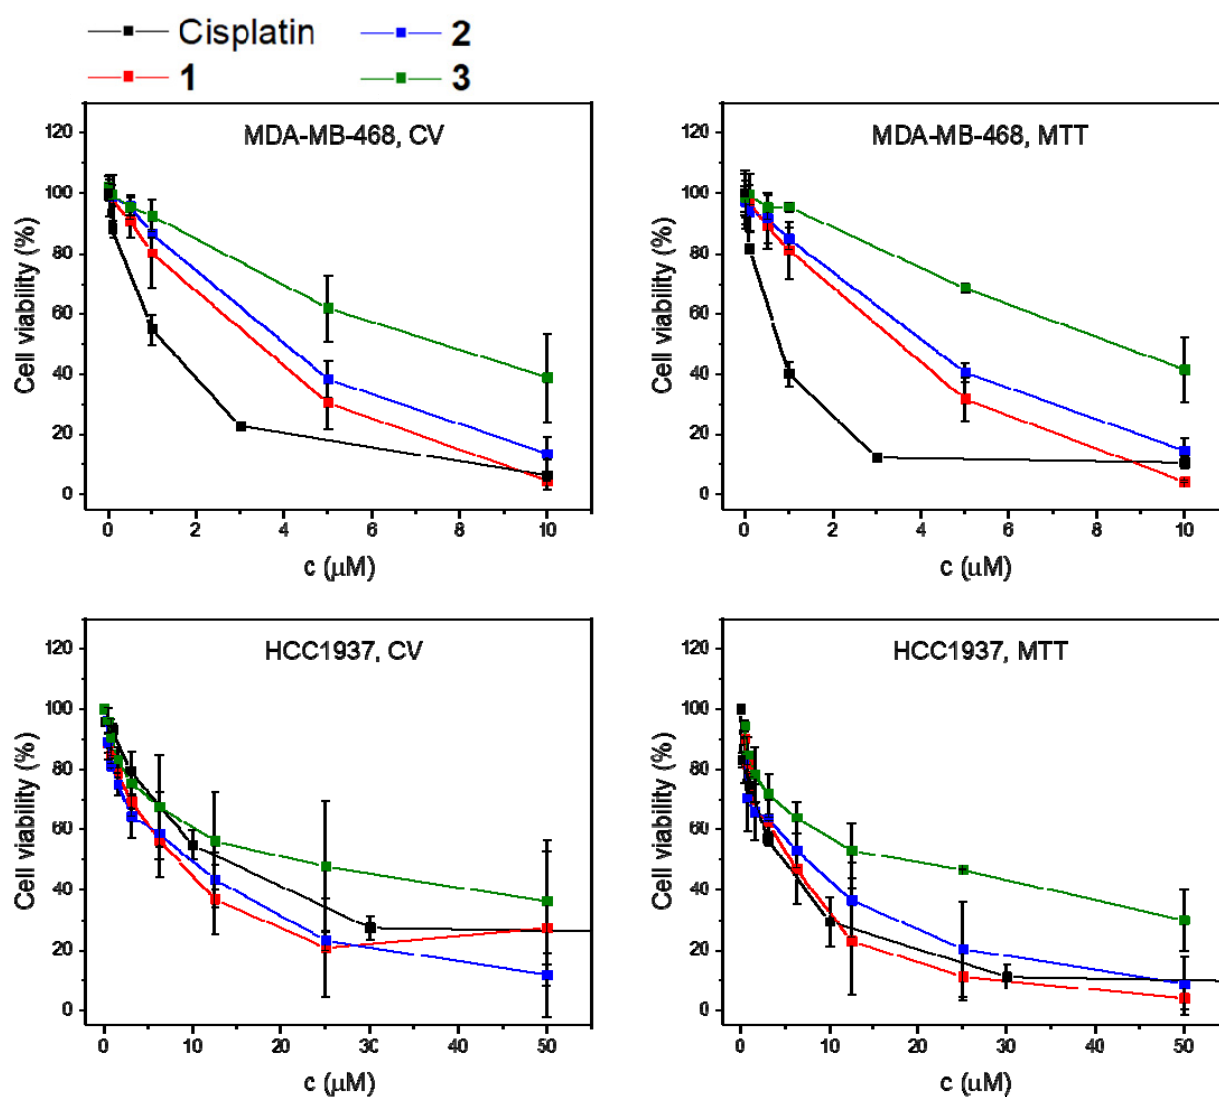

**Figure S27.** Cell viability of cisplatin, **1**, **2** and **3** determined by CV and MTT assays in MDA-MB-468 and HCC1937 human breast cancer cell lines.

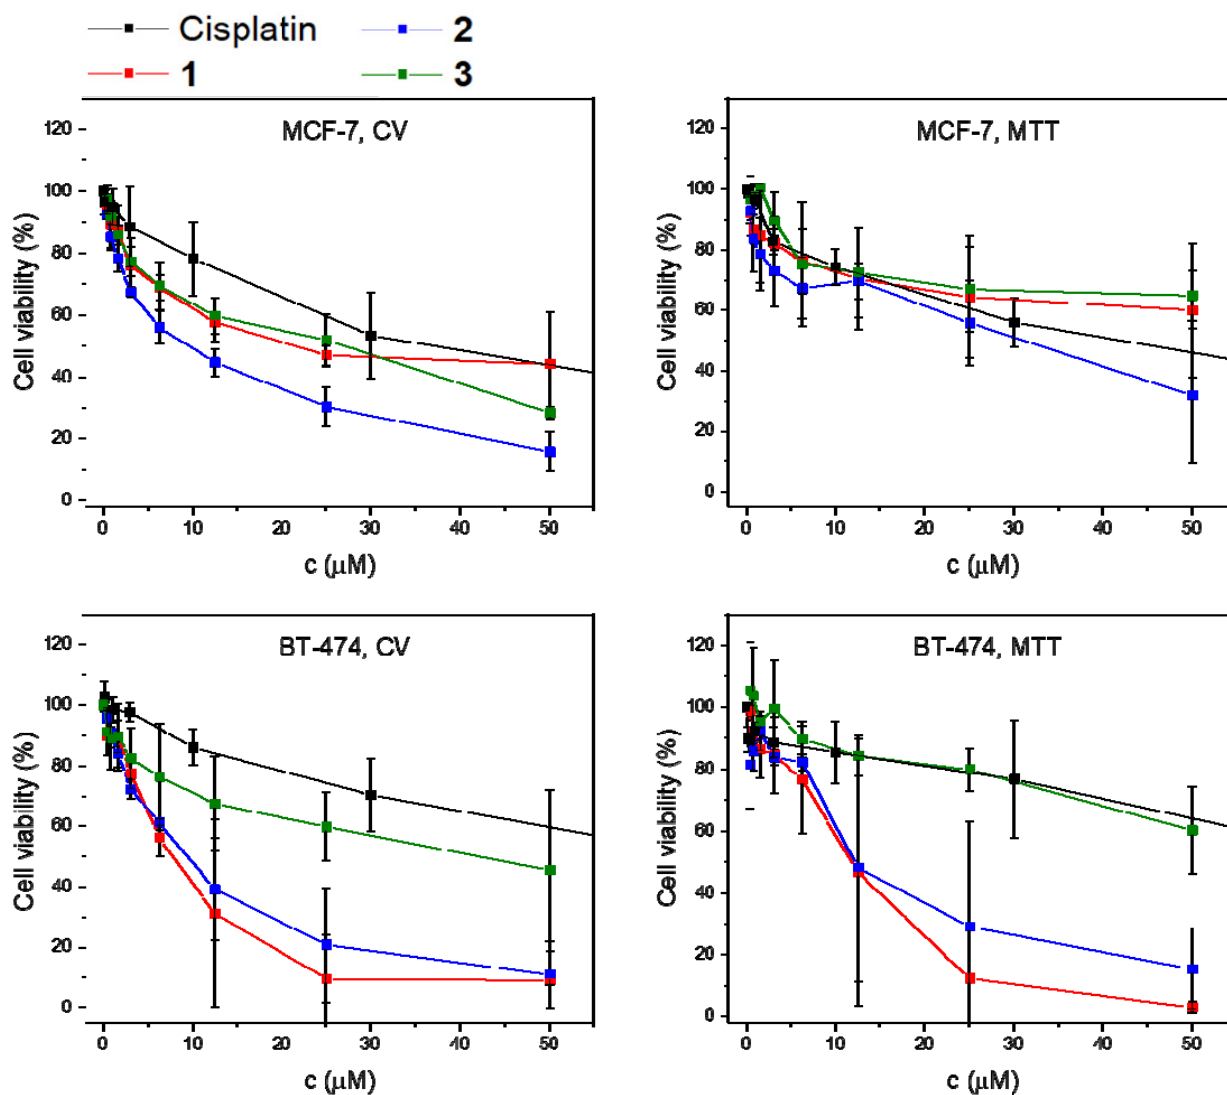

**Figure S28.** Cell viability of cisplatin, 1, 2 and 3 determined by CV and MTT assays in MCF-7 and BT-474 human breast cancer cell lines.

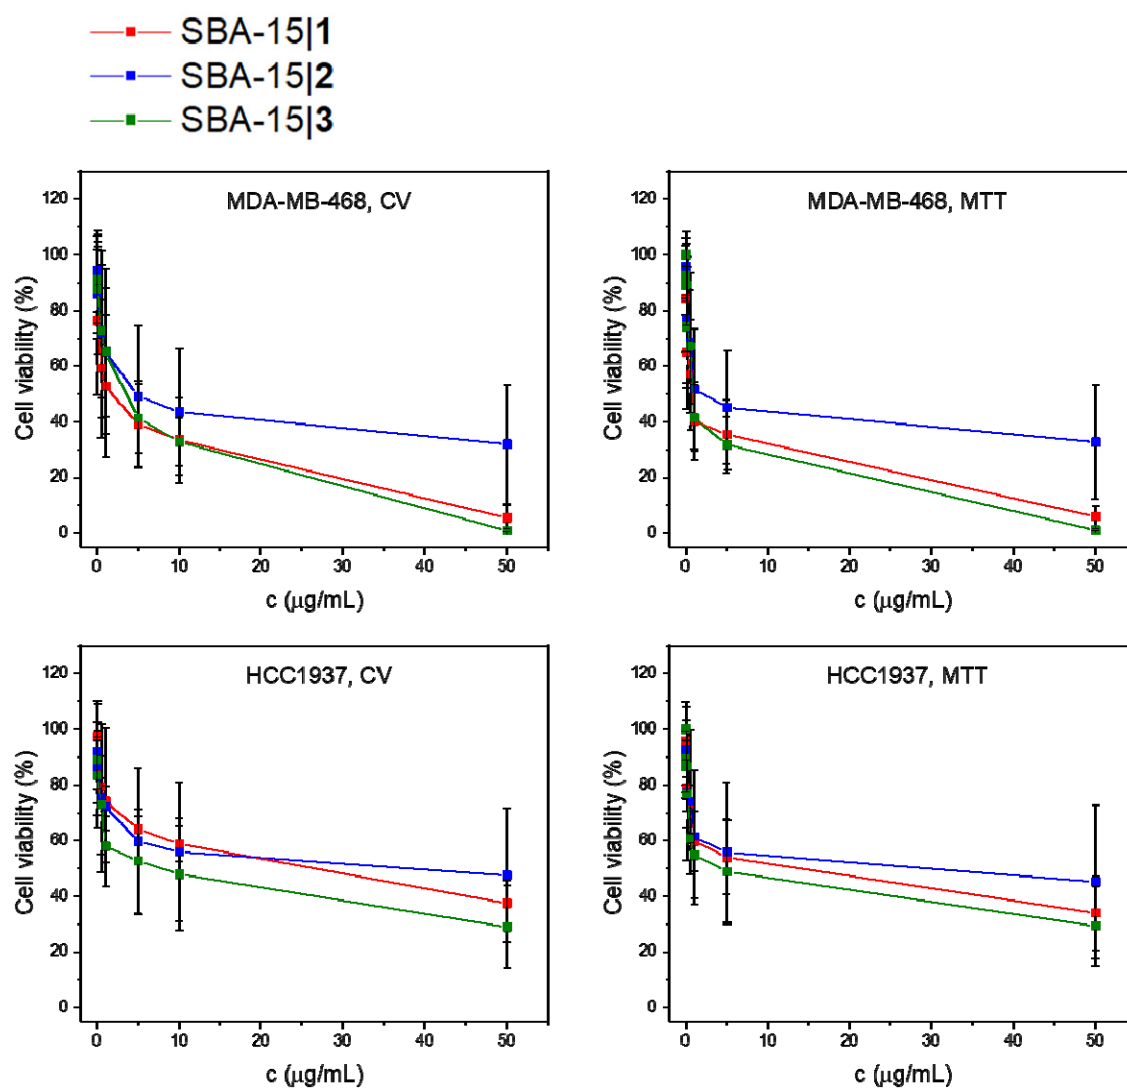

**Figure S29.** Cell viability of SBA-15|1, SBA-15|2 and SBA-15|3 determined by CV and MTT assays in MDA-MB-468 and HCC1937 human breast cancer cell lines.

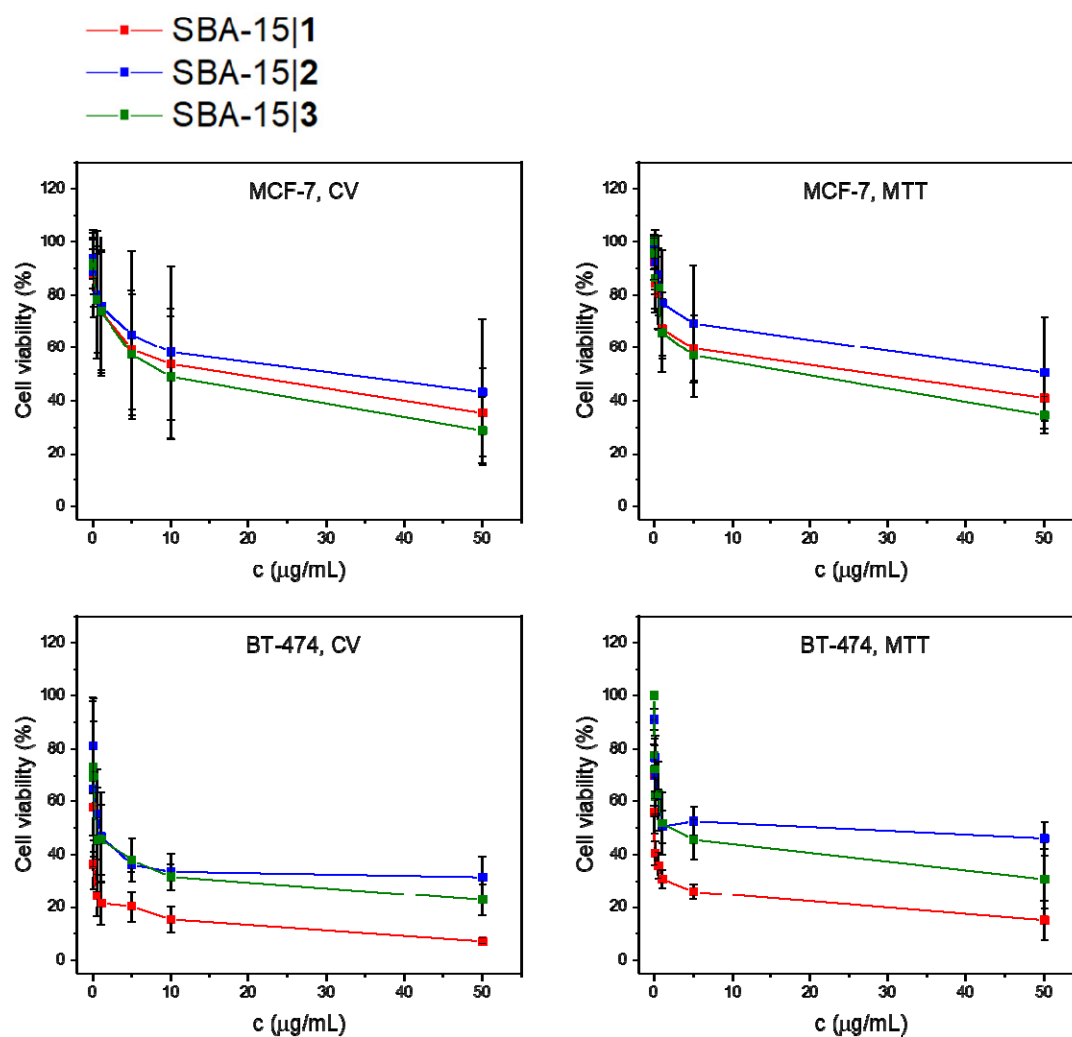

**Figure S30.** Cell viability of SBA-15|1, SBA-15|2 and SBA-15|3 determined by CV and MTT assays in MCF-7 and BT-474 human breast cancer cell lines.

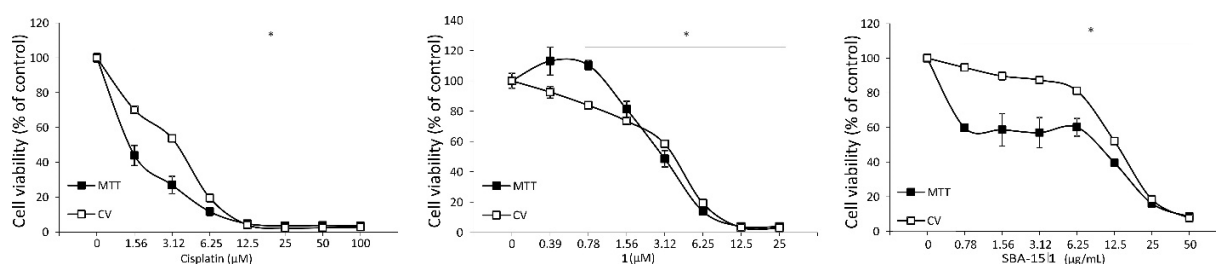

**Figure S31.** Cell viability of cisplatin, 1 and SBA-15|1 determined by CV and MTT assays in mouse-derived 4T1 breast cancer cell line.



## Urine parameters upon *in vivo* treatment

**Table S4.** Urine parameters of untreated animals (control) and animals exposed to treatment with cisplatin, **1** and SBA-15|**1**.

|                           | Control       | Cisplatin     | <b>1</b>      | SBA-15  <b>1</b> |
|---------------------------|---------------|---------------|---------------|------------------|
| Leukocytes (leu/ $\mu$ L) | 25 $\pm$ 0    | 25 $\pm$ 0    | 25 $\pm$ 0    | 25 $\pm$ 0       |
| Nitrites                  | 0 $\pm$ 0     | 0 $\pm$ 0     | 0 $\pm$ 0     | 0 $\pm$ 0        |
| Urobilinogen (mg/dL)      | 4 $\pm$ 0     | 2.5 $\pm$ 2.1 | 6 $\pm$ 2.8   | 2.5 $\pm$ 2.1    |
| Proteins (mg/dL)          | 100 $\pm$ 0   | 10 $\pm$ 0    | 30 $\pm$ 0    | 65 $\pm$ 49.5    |
| pH                        | 6 $\pm$ 0     | 6 $\pm$ 0     | 6 $\pm$ 0     | 7 $\pm$ 0        |
| Blood (ery/ $\mu$ L)      | 0 $\pm$ 0     | 0 $\pm$ 0     | 0 $\pm$ 0     | 0 $\pm$ 0        |
| Specific Gravity          | 1030 $\pm$ 0  | 1030 $\pm$ 0  | 1030 $\pm$ 0  | 1030 $\pm$ 0     |
| Ketone (mg/dL)            | 30 $\pm$ 28.3 | 10 $\pm$ 0    | 7.5 $\pm$ 3.5 | 10 $\pm$ 0       |
| Bilirubin (mg/dL)         | 0.8 $\pm$ 0.4 | 1 $\pm$ 0     | 0.8 $\pm$ 0.4 | 1 $\pm$ 0        |
